# Supplementary material
Source: PubMed Central journal article supplement (PMC3979319)
Supplement: NIHMS552650-supplement-2.pdf [file NIHMS552650-supplement-2.pdf]

## Appendix.

The other members of the *Eunice Kennedy Shriver* National Institute of Child Health and Human Development (NICHD) Maternal-Fetal Medicine Units Network are as follows:

*The Ohio State University* — J. Iams, F. Johnson, C. Latimer, E. Weinandy, B. Maselli

*University of Texas Southwestern Medical Center* — K. Leveno, L. Moseley, J. Gold, D. Bradford, L. Fay, M. Garcia

*Columbia University* — M. Miodovnik, F. Malone, S. Bousleiman, H. Husami, V. Carmona, N. Fredericks, E. Gantioqui, B. Greenspan, M. Williams

*University of Utah* — K. Anderson (University of Utah Health Sciences Center), P. Ashby (University of Utah Health Sciences Center), S. McAllister (University of Utah Health Sciences Center), S. Quinn (LDS Hospital), A. Guzman (McKay-Dee Hospital), F. Castinella (LDS Hospital), J. Steiner (McKay-Dee Hospital), J. Parker (Utah Valley Regional Medical Center)

*University of Alabama at Birmingham* — J. Sheppard, J. Tisdale, A. Northen, W. Andrews

*Brown University* — D. Catlow, D. Allard, M. Seebeck, J. Tillinghast, S. Biastre

*University of North Carolina at Chapel Hill* — K. Dorman, S. Brody, S. Timlin, J. Bernhardt

*Drexel University* — M. Hoffman, E. Guzman, M. Talucci, T. Grossman, C. Perez, L. Zeghibe, P. Tabangin

*Case Western Reserve University-MetroHealth Medical Center* — B. Mercer, B. Stetzer, C. Milluzzi, W. Dalton, S. Pichette

*Wake Forest University Health Sciences* — M. Swain, P. Meis, J. White

*The University of Texas Health Science Center at Houston* — L. Gilstrap, K. Cannon, J. Martinez, D. Dusek

*University of Texas Medical Branch, Galveston* — J. Moss, J. Brandon, A. Jackson, G. Hankins, D. Sharp

*University of Pittsburgh* — M. Bickus, H. Birkland, M. Cotroneo, N. Cuddy

*Wayne State University* — G. Norman, P. Lockhart, S. Blackwell,

*Northwestern University* — P. Simon, G. Mallett

*Oregon Health and Science University* — L. Davis, E. Lairson, C. Cromett, C. Naze, M. Blaser

*The George Washington University Biostatistics Center* — E. Thom, J. Zachary, B. Getachew, C. Cobb, L. Leuchtenburg, S. Gilbert

*Eunice Kennedy Shriver National Institute of Child Health and Human Development* — S. Tolivaisa, K. Howell

Landon, MB, Mele L, Spong CY, Carpenter MW, Ramin SM, Casey B et al. The relationship between maternal glycemia and perinatal outcome. *Obstet Gynecol* 2011;117.

The authors provided this information as a supplement to their article.

© Copyright 2011 American College of Obstetricians and Gynecologists.
